# Supplementary material for: Two disjunct Pleistocene populations and anisotropic postglacial expansion shaped the current genetic structure of the relict plant Amborella trichopoda
Source: PubMed Central journal article supplement (PMC5562301; doi:10.1371/journal.pone.0183412), 2017-08-18
Supplement: pone.0183412.s001.pdf [file pone.0183412.s001.pdf]

# 1 Appendix S1

2

3 1 Bioinformatic data pre-processing ..... 2

4 1.1 Pipeline A: sequence mapping ..... 3

5 1.2 Pipeline B: SNP calling ..... 5

6 1.2.1 SNP dataset for genetic structure analyses ..... 5

7 1.2.2 List of SNP clusters ..... 5

8 1.3 Pipeline C: probabilistic joint site frequency spectrum ..... 7

9 2 Supplementary references ..... 9

10

11

12 1 **Bioinformatic data pre-processing**

13

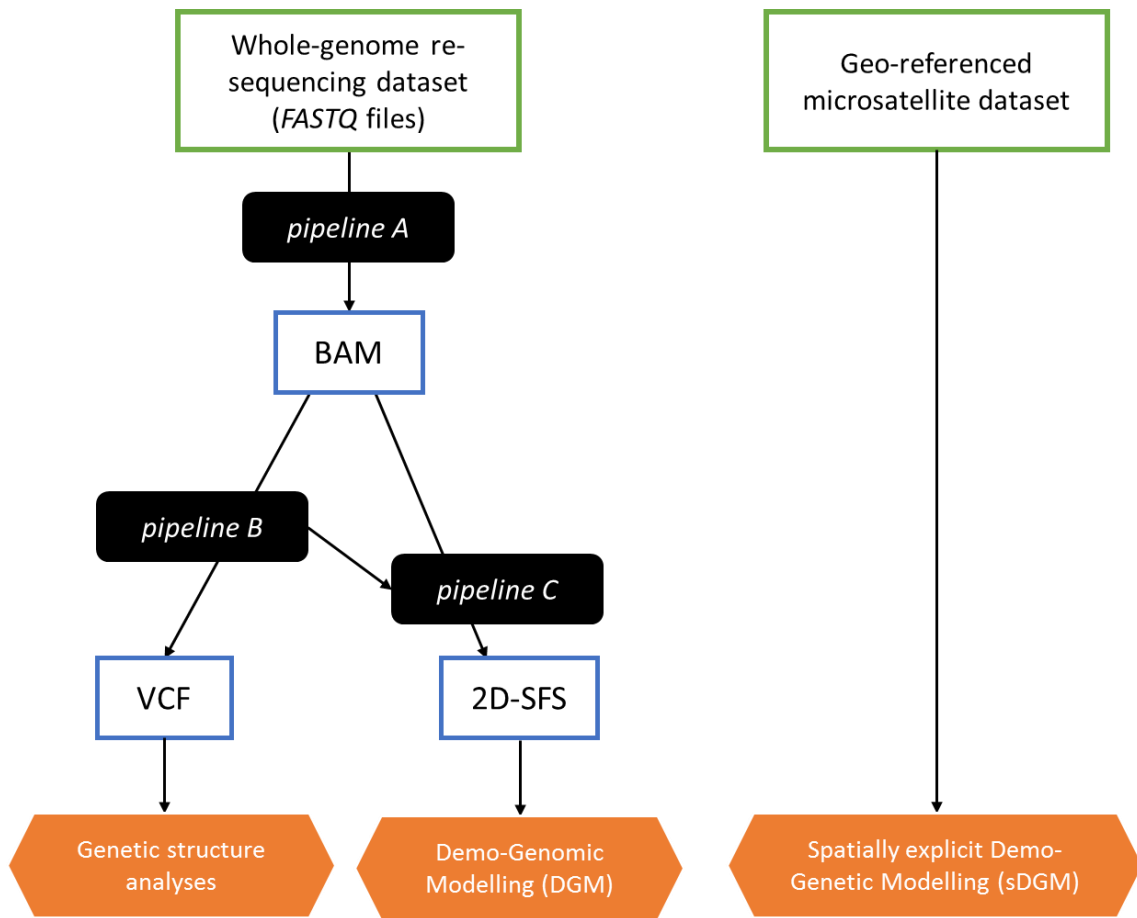

14

15

16 Figure A – Meta-pipeline describing the workflow for genetic data analyses and modelling.  
17 Input genetic datasets are represented in green boxes while intermediate bioinformatic files  
18 are represented in blue boxes. Orange polygons indicate the specific analyses carried out  
19 from each specific files generated using the bioinformatic pipelines (black-filled boxes)  
20 described in the following sections.

21

22

## 23 1.1 Pipeline A: sequence mapping

24

25 Whole-genome sequences from the 12 sampled individuals were mapped to the reference  
26 genome of *Amborella trichopoda* [1] using the bioinformatic **pipeline A** described below.

27 For all sampled individuals, paired-end Illumina HiSeq reads were retrieved from the FTP of  
28 the Amborella Genome Project [1]. Sanger encoding of the FASTQ files was checked and  
29 adaptors were trimmed out using the software cutadapt 1.8 [2]. Reads with a mean sequence  
30 quality lower than 30 were discarded. Retained forward and reverse reads were paired using  
31 a Perl script [3]. Processed reads were mapped onto the reference genome of *Amborella*  
32 *trichopoda* [1] using BWA 0.7.2 with the *aln* and *sampe* protocol [4]. We used the following  
33 mapping parameters: 4% of mismatch at most, 1 open gap at most, mismatch penalty of 3.  
34 We then discarded reads which verified any of the following criteria: reads were unmapped,  
35 reads had a low mapping quality < 5, read pairs were not properly aligned, and reads were  
36 cut in pieces (CIGAR flag badly shaped). Filtered mapped reads were then locally realigned to  
37 address problems of INDEL misalignment, using GATK 3.3 IndelRealigner [5] and default  
38 parameters. Optical duplicates resulting from PCR biases were finally removed using Picard  
39 Tools 1.83 MarkDuplicates.

40

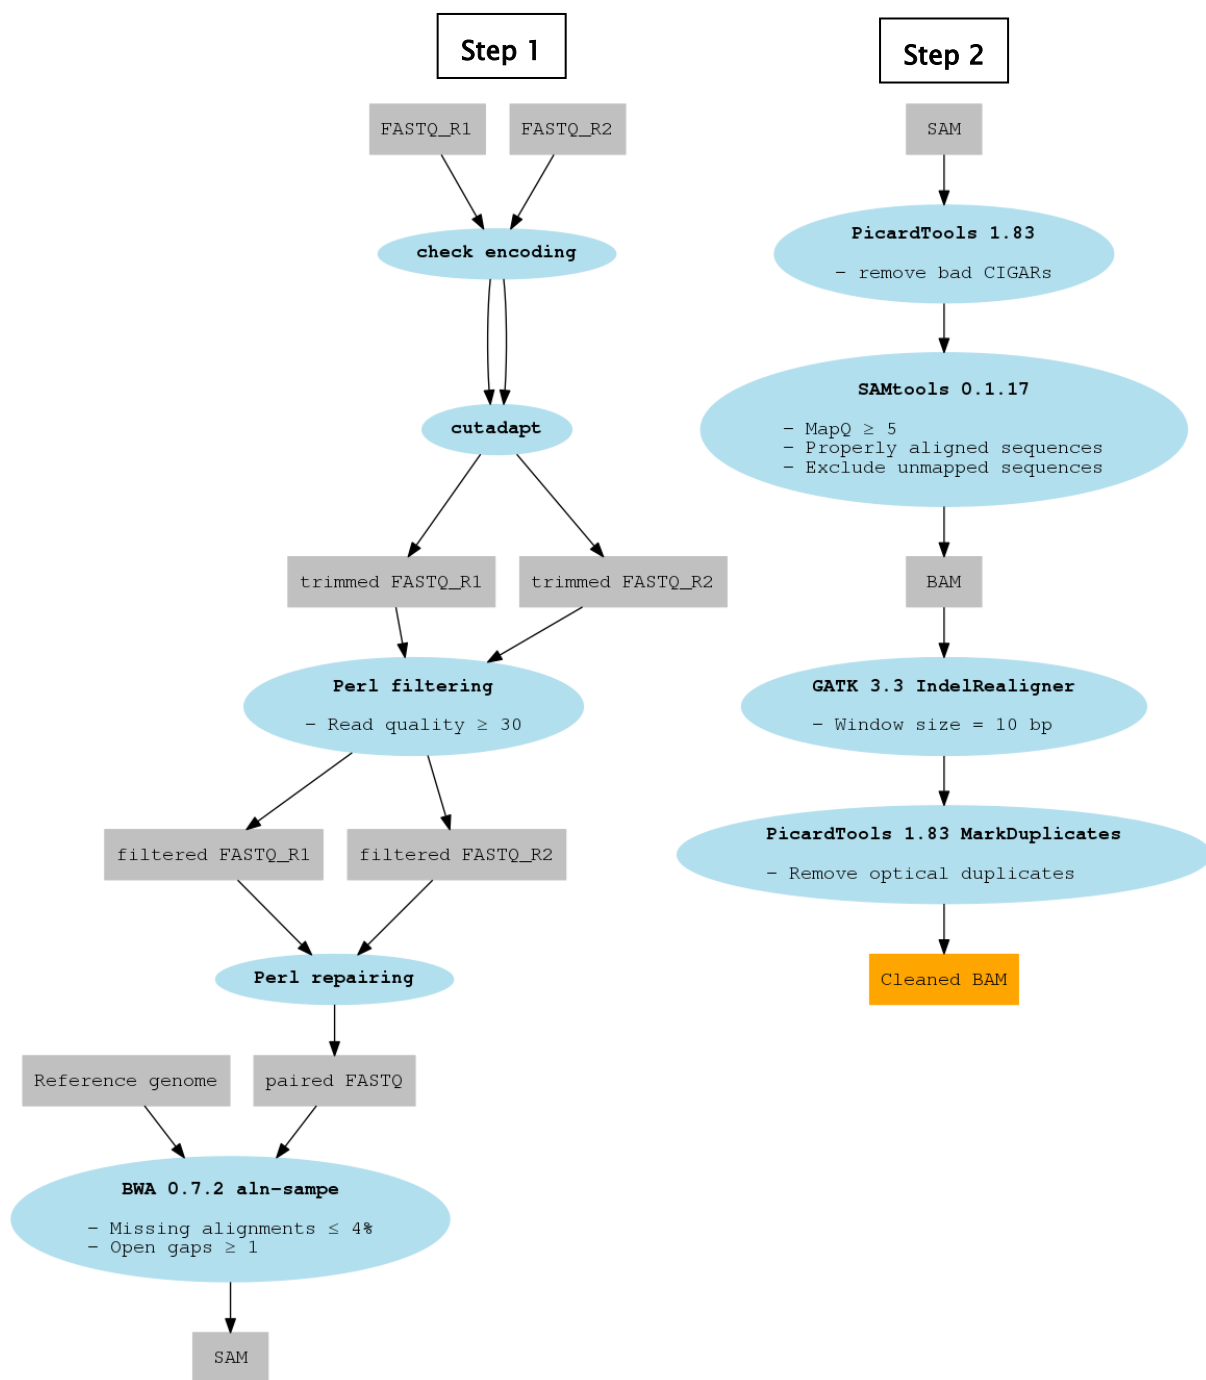

41

42

43 **Pipeline A** used to process raw paired-end sequences (FASTQ\_R1 and FASTQ\_R2 files) into  
 44 mapped sequence files (“Cleaned BAM”). Software packages (including particular modules)  
 45 are given in blue ellipses, their names in bold fonts and their options specified in a list  
 46 underneath. Intermediate files are shown as grey boxes. The final pipeline output is shown  
 47 as an orange box.

48

49

50

## 51 1.2 Pipeline B: SNP calling

52

53 Based on the BAM files obtained from **pipeline A**, we called genetic variants among the 12  
54 sampled individuals using the GATK 3.3 recommended pipeline: local *de-novo* assemblies of  
55 sample haplotypes (*HaplotypeCaller* module) followed by the cross-sample genotyping of  
56 called haplotypes (*GenotypeGVCFs* module) [5]. The variants were stored in a raw VCF file  
57 containing 7,458,468 biallelic SNPs.

58

### 59 1.2.1 SNP dataset for genetic structure analyses

60 From the raw VCF file, we generated a dataset of filtered SNPs which were used in genetic  
61 structure analyses. The SNPs considered for this final dataset had to meet all of the following  
62 conditions:

- 63 - strict biallelic single nucleotide polymorphism,
- 64 - Phred-scaled quality score for genotype assertion,  $QUAL > 500$ ,
- 65 - No missing genotype across samples,
- 66 - Mean genotype quality,  $GQ\_MEAN > 30.0$ ,
- 67 - Standard deviation on genotype qualities,  $GQ\_STDDEV < 30.0$ .

68 After the filtering procedure, we obtained 333,181 SNPs. We then uniformly sampled, across  
69 the genome, 100,000 SNPs from the filtered VCF in order to minimize linkage disequilibrium  
70 between markers.

71

### 72 1.2.2 List of SNP clusters

73 Before scanning whole raw sample genomes to construct the site frequency spectrum  
74 (**pipeline C**), we first processed the VCF file to identify a list of clustered SNPs to discard.  
75 These SNPs were potential artefacts caused by biased assemblies (related to multigene  
76 families, repeated sequences...) in the reference genomes and could therefore bias the SFS.  
77 We observed that these artefactual SNPs were characterized by the following specificities:

78 they were heterozygous for all individuals, had a sequencing depth higher (often  $\geq 2$ -fold)  
79 than the mean depth, and were located in dense clusters.

80 SNPs were considered clustered when there were  $n \geq 3$  of them present within any sliding 70  
81 base long window of the genome. They were identified using GATK 3.3 *VariantFiltration* after  
82 removal of variants with  $QUAL < 40$ .

83

84

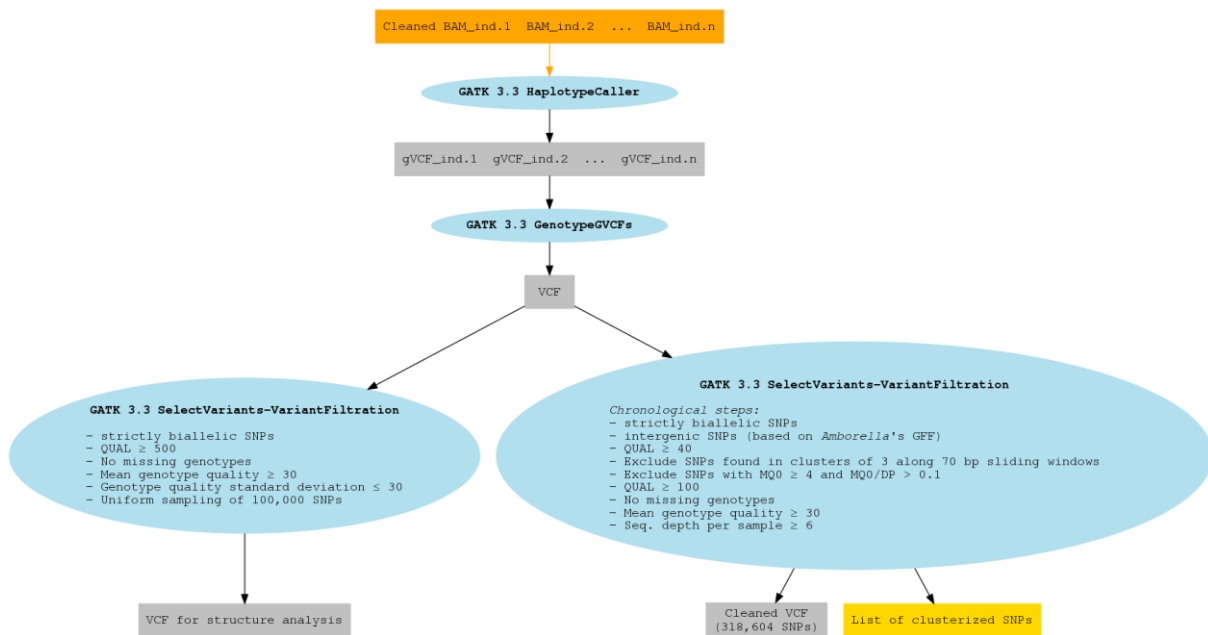

85

86

87 **Pipeline B** used to process cleaned sample-specific mapped sequence files into a set of  
88 single nucleotide polymorphisms used for genetic clustering analyses (left side) and into a  
89 temporary list of clustered SNPs passed to the next **pipeline C** (right side).

90

### 91 1.3 Pipeline C: probabilistic joint site frequency spectrum

92

93 Based on the 11 individuals (without *Aoupinié*) clustering at  $K=2$ , we summarized whole-  
94 genome polymorphisms into a two-dimensional joint and folded site frequency spectrum  
95 (SFS). An SFS summarizes the full polymorphism information from independent genetic  
96 markers and is accessible to likelihood-based demo-genomic inferences. Here, the 2D-SFS  
97 is a matrix specifying the number of SNPs found at the coordinates  $(f_N, f_S)$  of minor allele  
98 frequencies (or counts) in both groups *North* and *South*.

99 The SFS is sensitive to the sequencing error rate and to the sequencing depth at each  
100 position of the reference genome (*i.e.* the number of reads available at each position of the  
101 reference genome) which alter the power of genotype inference. If the coverage depth is low,  
102 usual methods based on genotype calling (*e.g.* VCF files) fail to recover the true amount of  
103 SNPs with very low minor allele frequencies, potentially leading to significant biases in  
104 demographic inferences.

105 Indeed, the lower the coverage depth in the whole-genome sequence dataset, the more  
106 uncertain the inference of individual genotypes is. To summarize whole-genome  
107 polymorphisms by taking genotype likelihoods into account, we therefore constructed a  
108 probabilistic site frequency spectrum which we then used for demo-genomic inferences [6].

109 Based on the BAM file output from **pipeline A**, the SFS was computed using ANGSD 0.9 [7].  
110 Genotype likelihoods were computed using the SOAPsnp sequencing error model which is  
111 based on calibration matrices of sequencing errors computed in a first pass across the  
112 genome [8]. Based on calibration matrices, we then computed the SFS (polarizing allele state  
113 on the reference genome) at the positions of the reference genome which met the following  
114 criteria:

- 115 • for all BAMs, reads containing the position are uniquely mapped,
- 116 • the position is located in an intergenic region (based on *A. trichopoda* genomic  
117 annotation GFF file and assuming that intergenic SNPs are less likely under selection  
118 than coding ones),
- 119 • for all BAMs, individual depth  $\geq 6$  at the position,

- 120 • for all BAMs, sequence quality  $\geq 35$  at the position,
- 121 • for all BAMs, mapping quality  $\geq 25$  at the position,
- 122 • across BAMs, not too many different alleles at the position (`-setMaxDiffObs=1`),
- 123 • the position is not referenced in the list of clustered SNPs (as obtained from **pipeline**
- 124 **B**, yellow box on the right).

125 In the absence of any close living relative for *A. trichopoda*, we cannot determine the  
126 ancestral and derived states of biallelic SNPs. In such cases, the SFS cannot be based on  
127 *derived* allele frequencies but rather on *minor* allele frequencies. For a given SNP, the minor  
128 allele frequency is defined as the frequency of the least frequent allele across all sampled  
129 individuals. In a first step, allelic polymorphisms were polarized according to the reference  
130 base considered as the (pseudo) ancestral allele. This procedure generated a (pseudo)  
131 derived 2D-SFS. We then *a posteriori* folded it, *i.e.* converted *derived* allele counts (or  
132 frequencies) into *minor* allele counts (or frequencies). Using simulations, we checked that  
133 this *post*-folding procedure was not introducing any biases in the SFS folding. Note that in  
134 situations where we cannot discriminate between the minor/major alleles of a SNP (because  
135 the frequency of both alleles is  $\frac{1}{2}$  across sampled individuals), we recorded a half-count in  
136 the complementary cells of the SFS for each allele alternatively considered as minor (as in  
137 fastsimcoal).

138 At the end of the analysis, the probabilistic 2D-SFS contained 118,907 SNPs.



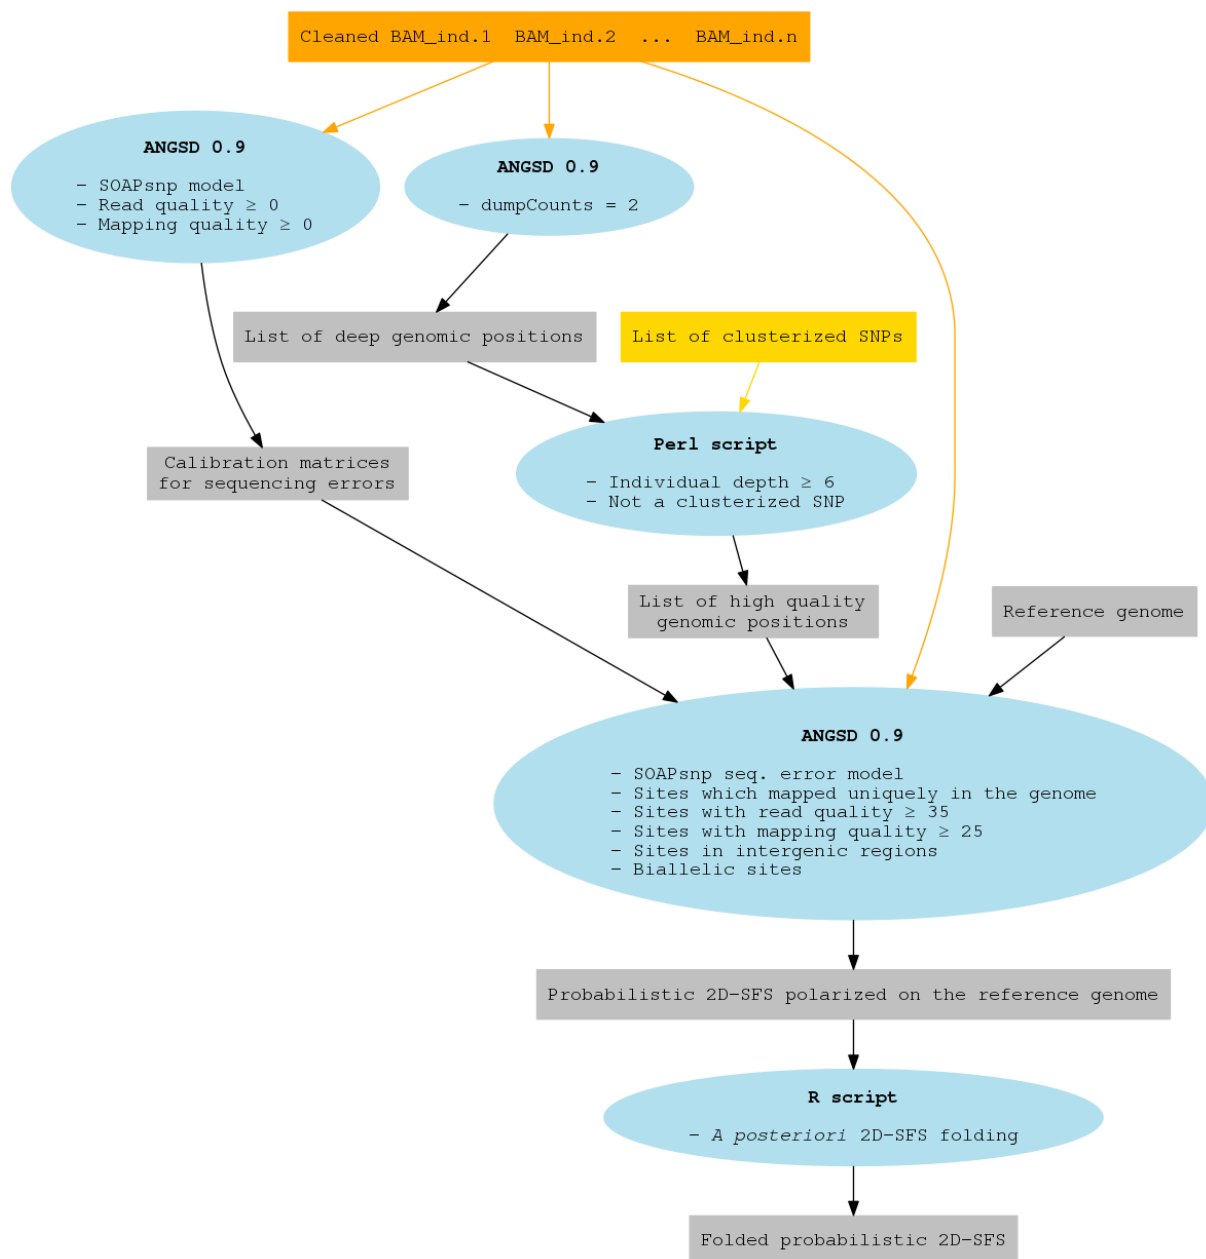

139

140

141 **Pipeline C** used to process mapped reads from the 11 sampled individuals into a folded  
 142 probabilistic joint site frequency spectrum. The yellow box is the list of clustered SNPs  
 143 output from the previous **pipeline B**.

144

## 145 2 Supplementary references

146

147 1. Amborella Genome Project (2013) The Amborella genome and the evolution of flowering plants.  
 148 Science 342.

- 149 2. Martin M (2011) Cutadapt removes adapter sequences from high-throughput sequencing reads.  
150 2011 17.
- 151 3. Nabholz B, Sarah G, Sabot F, Ruiz M, Adam H, et al. (2014) Transcriptome population genomics  
152 reveals severe bottleneck and domestication cost in the African rice (*Oryza glaberrima*).  
153 *Molecular Ecology* 23: 2210-2227.
- 154 4. Li H, Durbin R (2009) Fast and accurate short read alignment with Burrows-Wheeler transform.  
155 *Bioinformatics* 25: 1754-1760.
- 156 5. McKenna A, Hanna M, Banks E, Sivachenko A, Cibulskis K, et al. (2010) The Genome Analysis  
157 Toolkit: a MapReduce framework for analyzing next-generation DNA sequencing data.  
158 *Genome Res* 20: 1297-1303.
- 159 6. Excoffier L, Foll M (2011) fastsimcoal: a continuous-time coalescent simulator of genomic diversity  
160 under arbitrarily complex evolutionary scenarios. *Bioinformatics*.
- 161 7. Korneliussen T, Albrechtsen A, Nielsen R (2014) ANGSD: Analysis of Next Generation Sequencing  
162 Data. *BMC Bioinformatics* 15: 356.
- 163 8. Li R, Li Y, Fang X, Yang H, Wang J, et al. (2009) SNP detection for massively parallel whole-genome  
164 resequencing. *Genome Res* 19: 1124-1132.
- 165
