# Supplementary material for: Two disjunct Pleistocene populations and anisotropic postglacial expansion shaped the current genetic structure of the relict plant Amborella trichopoda
Source: PubMed Central journal article supplement (PMC5562301; doi:10.1371/journal.pone.0183412), 2017-08-18
Supplement: pone.0183412.s003.pdf [file pone.0183412.s003.pdf]

**S1 Table. Genetic sampling design.**

| Population          | Latitude <sup>c</sup>                                                                                     | Longitude <sup>c</sup> | SAMPLE SIZES                 |                                   |                                                |
|---------------------|-----------------------------------------------------------------------------------------------------------|------------------------|------------------------------|-----------------------------------|------------------------------------------------|
|                     |                                                                                                           |                        | Raw SSR dataset <sup>a</sup> | Filtered SSR dataset <sup>b</sup> | Whole-genome resequencing dataset <sup>a</sup> |
| Amieu               | 7610019.653                                                                                               | 583889.5808            | 16                           | 32                                | 1                                              |
| Aoupinié            | 7660520.957                                                                                               | 533180.7683            | 27                           | 51                                | 1                                              |
| Ba                  | 7654287.134                                                                                               | 556460.0972            | 11                           | 17                                | 1                                              |
| Boregaou            | 7630222.625                                                                                               | 553742.8979            | 13                           | 26                                | 1                                              |
| Dogny               | 7608714.055                                                                                               | 589929.3372            | 31                           | 60                                | 1                                              |
| Mé Foméchwawa       | 7617318.384                                                                                               | 575332.0226            |                              |                                   | 1                                              |
| Mé Ori              | 7618405.476                                                                                               | 570170.3067            | 12                           | 22                                | 1                                              |
| Nakada <sup>d</sup> | 7607044.021                                                                                               | 609343.6338            | 37                           | 74                                |                                                |
| Ponandou            | 7698038.907                                                                                               | 522890.1535            | 14                           | 25                                | 1                                              |
| Pwicaté             | 7683197.481                                                                                               | 491324.56              | 26                           | 52                                | 1                                              |
| Tchamba             | 7676804.964                                                                                               | 524928.0609            | 9                            | 18                                | 1                                              |
| Tonine              | 7698444.956                                                                                               | 510146.0048            | 26                           | 42                                | 1                                              |
| Santa Cruz          | Grown in the Santa Cruz Conservatorium (USA),<br>likely sampled from a wild population near Mé Foméchwawa |                        |                              |                                   | 1                                              |
| <b>TOTAL</b>        |                                                                                                           |                        | <b>222</b>                   | <b>419</b>                        | <b>12</b>                                      |

<sup>a</sup> Number of diploid individuals.

<sup>b</sup> Number of haploid individuals.

<sup>c</sup> UTM 58S.

<sup>d</sup> Nakada population, representing an original and distinct genetic group according to Poncet et al. (2013), was not considered in the analyses based on the whole-genome resequencing dataset because it would have been excessively under-sampled (single individual).
