# Supplementary material for: Two disjunct Pleistocene populations and anisotropic postglacial expansion shaped the current genetic structure of the relict plant Amborella trichopoda
Source: PubMed Central journal article supplement (PMC5562301; doi:10.1371/journal.pone.0183412), 2017-08-18
Supplement: pone.0183412.s004.pdf [file pone.0183412.s004.pdf]

**S2 Table. Matrix of pairwise allele sharing distances.**

|           | Amieu | Aoupinie | Ba    | Boregaou | Dogny | MeFo  | MeOri | Ponandou | Pwicate | Tchamba | Tonine |
|-----------|-------|----------|-------|----------|-------|-------|-------|----------|---------|---------|--------|
| Amieu     |       |          |       |          |       |       |       |          |         |         |        |
| Aoupinie  | 0.340 |          |       |          |       |       |       |          |         |         |        |
| Ba        | 0.311 | 0.311    |       |          |       |       |       |          |         |         |        |
| Boregaou  | 0.245 | 0.350    | 0.245 |          |       |       |       |          |         |         |        |
| Dogny     | 0.211 | 0.366    | 0.318 | 0.235    |       |       |       |          |         |         |        |
| MeFo      | 0.282 | 0.407    | 0.349 | 0.284    | 0.293 |       |       |          |         |         |        |
| MeOri     | 0.239 | 0.386    | 0.315 | 0.224    | 0.239 | 0.206 |       |          |         |         |        |
| Ponandou  | 0.444 | 0.295    | 0.433 | 0.456    | 0.463 | 0.513 | 0.495 |          |         |         |        |
| Pwicate   | 0.448 | 0.291    | 0.431 | 0.462    | 0.462 | 0.509 | 0.494 | 0.223    |         |         |        |
| Tchamba   | 0.397 | 0.257    | 0.379 | 0.406    | 0.420 | 0.462 | 0.445 | 0.228    | 0.235   |         |        |
| Tonine    | 0.462 | 0.303    | 0.428 | 0.473    | 0.479 | 0.514 | 0.504 | 0.186    | 0.227   | 0.261   |        |
| SantaCruz | 0.300 | 0.452    | 0.370 | 0.290    | 0.298 | 0.176 | 0.168 | 0.567    | 0.570   | 0.515   | 0.571  |
