# Supplementary material for: Two disjunct Pleistocene populations and anisotropic postglacial expansion shaped the current genetic structure of the relict plant Amborella trichopoda
Source: PubMed Central journal article supplement (PMC5562301; doi:10.1371/journal.pone.0183412), 2017-08-18
Supplement: pone.0183412.s005.pdf [file pone.0183412.s005.pdf]

**S3 Table. Typology of the non-spatial demo-genomic models.**

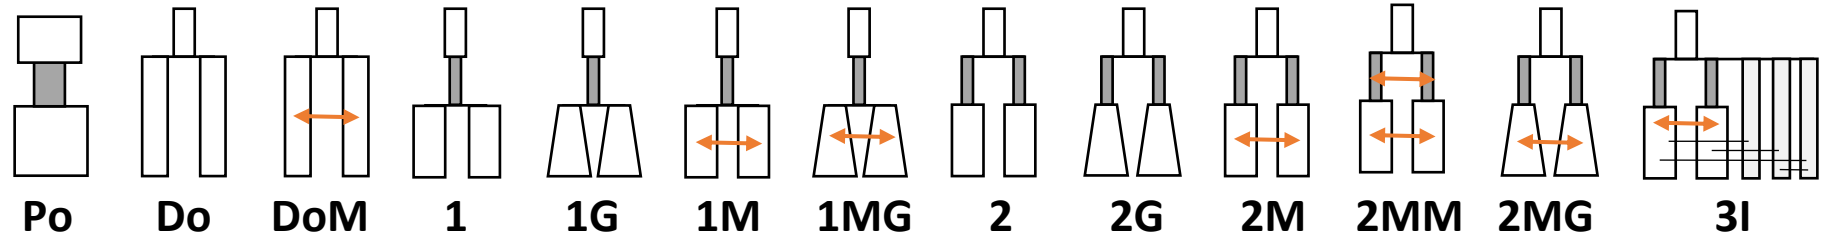

|                                         | <b>Po</b> | <b>Do</b> | <b>DoM</b> | <b>1</b> | <b>1G</b> | <b>1M</b> | <b>1MG</b> | <b>2</b> | <b>2G</b> | <b>2M</b> | <b>2MM</b> | <b>2MG</b> | <b>3I</b> |
|-----------------------------------------|-----------|-----------|------------|----------|-----------|-----------|------------|----------|-----------|-----------|------------|------------|-----------|
| Number of expansion origins             | 1         | 0         | 0          | 1        | 1         | 1         | 1          | 2        | 2         | 2         | 2          | 2          | 2         |
| Recent gene flow                        | No        | No        | Yes        | No       | No        | Yes       | Yes        | No       | No        | Yes       | Yes        | Yes        | Yes       |
| Gene flow between ancestral populations | No        | No        | No         | No       | No        | No        | No         | No       | No        | No        | Yes        | No         | No        |
| Exponential expansion                   | No        | No        | No         | No       | Yes       | No        | Yes        | No       | Yes       | No        | No         | Yes        | No        |
