# Supplementary material for: Two disjunct Pleistocene populations and anisotropic postglacial expansion shaped the current genetic structure of the relict plant Amborella trichopoda
Source: PubMed Central journal article supplement (PMC5562301; doi:10.1371/journal.pone.0183412), 2017-08-18
Supplement: pone.0183412.s006.pdf [file pone.0183412.s006.pdf]

**S4 Table. Non spatial demo-genomic model comparison.** Maximum composite likelihoods, AICs and evidence ratios for the 13 tested demo-genomic models.

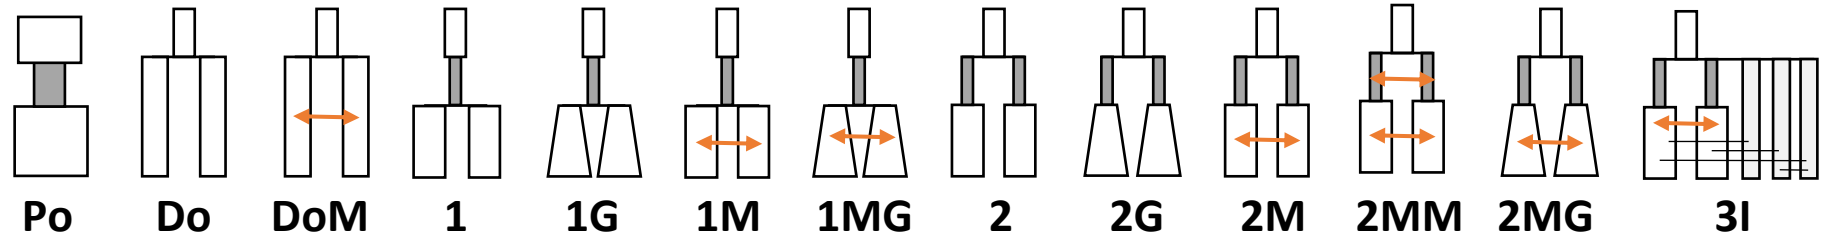

|                                  |          |          |          |          |          |          |          |          |          |          |          |           |          |
|----------------------------------|----------|----------|----------|----------|----------|----------|----------|----------|----------|----------|----------|-----------|----------|
| <b>ln(L)<sup>a</sup></b>         | -1269285 | -1175486 | -1170663 | -1175141 | -1174252 | -1170585 | -1169175 | -1174292 | -1174221 | -1168256 | -1168293 | -1168546  | -1168180 |
| <b>AIC</b>                       | 2538583  | 2350983  | 2341339  | 2350297  | 2348522  | 2341188  | 2338372  | 2348601  | 2348462  | 2336532  | 2336610  | 2337115   | 2336384  |
| <b>w<sub>1</sub><sup>b</sup></b> | 0        | 0        | 0        | 0        | 0        | 0        | 0        | 0        | 0        | 1        | 1.15E-17 | 2.53E-127 |          |
| <b>w<sub>2</sub><sup>b</sup></b> | 0        | 0        | 0        | 0        | 0        | 0        | 0        | 0        | 0        | 7.28E-33 | 8.41E-50 | 1.84E-159 | 1        |

<sup>a</sup> Logarithm of the maximum composite likelihood of the fittest run for each model.

<sup>b</sup> Evidence ratio ( $w_1$ ) including the **3I** model; ( $w_2$ ) or not. The formula to calculate the evidence ratio is:

$$w_i = e^{-\Delta_i/2} \div \sum_{m=1}^M e^{-\Delta_m/2}$$

with  $m$  the model index and  $\Delta_i = AIC_i - AIC_{min}$ , where  $AIC_{min}$  is the overall minimum AIC across all independent runs and candidate models.
