# Supplementary material for: Two disjunct Pleistocene populations and anisotropic postglacial expansion shaped the current genetic structure of the relict plant Amborella trichopoda
Source: PubMed Central journal article supplement (PMC5562301; doi:10.1371/journal.pone.0183412), 2017-08-18
Supplement: pone.0183412.s007.pdf [file pone.0183412.s007.pdf]

**S5 Table. Parameter estimation for the most likely demo-genomic model (2M).**

| <b>Parameter</b>      | <b>Point estimate</b> | <b>Confidence Interval (95%)</b> | <b>Definition</b>                                                                        |
|-----------------------|-----------------------|----------------------------------|------------------------------------------------------------------------------------------|
| <b>NeNorth</b>        | 10,136                | 4,051 – 38,040                   | Current haploid effective size of the North population                                   |
| <b>NeSouth</b>        | 9,834                 | 3,684 – 38,560                   | Current haploid effective size of the South population                                   |
| <b>TBottle</b>        | 3,197                 | 1,625 – 9,760                    | Age (generations BP) of the expansion onset                                              |
| <b>NeBottle_North</b> | 10,101                | 2,173 – 29,986                   | Haploid effective size of the North ancestral population                                 |
| <b>NeBottle_South</b> | 1,548                 | 52 – 9,676                       | Haploid effective size of the South ancestral population                                 |
| <b>TSplit</b>         | 5,844                 | 3,425 – 21,943                   | Age (generations BP) of the divergence between the North and South ancestral populations |
| <b>NeAncestral</b>    | 10,464                | 146 – 40,450                     | Haploid effective size of the earliest population                                        |
| <b>M[N→S]</b>         | 1.06E-4               | 1.17E-5 – 1.43E-4                | Per-generation migration rate from North to South present populations                    |
| <b>M[S→N]</b>         | 3.48E-5               | 2.83E-5 – 2.48E-4                | Per-generation migration rate from South to North present populations                    |
| <b>MutationRate</b>   | 4.15E-8               | 9.14E-9 – 8.35E-8                | Number of neutral substitutions per site per generation                                  |
