# Supplementary material for: Two disjunct Pleistocene populations and anisotropic postglacial expansion shaped the current genetic structure of the relict plant Amborella trichopoda
Source: PubMed Central journal article supplement (PMC5562301; doi:10.1371/journal.pone.0183412), 2017-08-18
Supplement: pone.0183412.s008.pdf [file pone.0183412.s008.pdf]

## S6 Table. Predictive check of the adjusted 2M demo-genomic model.

Genetic summary statistics derived from the observed probabilistic SFS vs. their prediction under the adjusted 2M scenario.

|                                   |       | <b>Observed</b>  | <b>Predicted (mean)</b> | <b>Predicted (CI95% low)<sup>g</sup></b> | <b>Predicted (IC95% up)</b> |
|-----------------------------------|-------|------------------|-------------------------|------------------------------------------|-----------------------------|
| <b>Singlet<sup>a</sup></b>        | North | <b>6.48E-04</b>  | 6.94E-04                | 6.83E-04                                 | 7.06E-04                    |
|                                   | South | <b>7.54E-04</b>  | 7.39E-04                | 7.30E-04                                 | 7.48E-04                    |
| <b>Private<sup>b</sup></b>        | North | <b>1.30E-03</b>  | 1.32E-03                | 1.31E-03                                 | 1.34E-03                    |
|                                   | South | <b>1.52E-03</b>  | 1.53E-03                | 1.51E-03                                 | 1.54E-03                    |
| <b>Shared<sup>c</sup></b>         |       | <b>1.18E-03</b>  | 1.14E-03                | 1.13E-03                                 | 1.15E-03                    |
| <b>S<sup>d</sup></b>              | North | <b>2.47E-03</b>  | 2.46E-03                | 2.45E-03                                 | 2.48E-03                    |
|                                   | South | <b>2.69E-03</b>  | 2.66E-03                | 2.64E-03                                 | 2.68E-03                    |
| <b>H<sub>s</sub><sup>e</sup></b>  | North | <b>0.2272304</b> | 0.2266182               | 0.225501                                 | 0.2277367                   |
|                                   | South | <b>0.1882863</b> | 0.1892305               | 0.1883246                                | 0.1901639                   |
| <b>F<sub>ST</sub><sup>f</sup></b> |       | <b>0.1599501</b> | 0.1598357               | 0.1577013                                | 0.1619462                   |

<sup>a</sup> Proportion of singleton SNPs (over all sites).

<sup>b</sup> Proportion of private SNPs (over all sites).

<sup>c</sup> Proportion of shared SNPs (over all sites).

<sup>d</sup> Proportion of SNPs over all sites.

<sup>e</sup> Expected heterozygosity.

<sup>f</sup> Wright's  $F_{ST}$ .

<sup>g</sup> Lower bound of the confidence interval at 95%.
