# Supplementary material for: Two disjunct Pleistocene populations and anisotropic postglacial expansion shaped the current genetic structure of the relict plant Amborella trichopoda
Source: PubMed Central journal article supplement (PMC5562301; doi:10.1371/journal.pone.0183412), 2017-08-18
Supplement: pone.0183412.s009.pdf [file pone.0183412.s009.pdf]

**S7 Table. Mean-standardized root-mean-square error (SRMSE) of parameter estimation for the spatial coalescent model.**

|                                  | <b>Mean-standardized root mean square error (SRMSE)</b> |
|----------------------------------|---------------------------------------------------------|
| CARCAP1 (North)                  | 72.52%                                                  |
| CARCAP2 (Central)                | 64.44%                                                  |
| CARCAP3 (South)                  | 9.91%                                                   |
| COORD_SOURCE_1 <sup>a</sup>      | 0.28%                                                   |
| COORD_SOURCE_1_LONG <sup>a</sup> | 3.60%                                                   |
| COORD_SOURCE_2 <sup>b</sup>      | 0.28%                                                   |
| COORD_SOURCE_2_LONG <sup>b</sup> | 4.76%                                                   |
| GAMMA                            | 11.38%                                                  |
| MID.ALT                          | 57.69%                                                  |
| MUTRATE                          | 5.04%                                                   |
| SOURCE1.Ne <sup>a</sup>          | 42.97%                                                  |
| SOURCE2.Ne <sup>b</sup>          | 50.31%                                                  |
| GROWTHRATE                       | 78.51%                                                  |
| MIGRATIONRATE                    | 23.45%                                                  |
| PLAIN.F.COEF.VAL                 | 63.68%                                                  |
| SOMMIT.F.COEF.VAL                | 82.67%                                                  |

<sup>a</sup> South population

<sup>b</sup> North population
