# Supplementary material for: Two disjunct Pleistocene populations and anisotropic postglacial expansion shaped the current genetic structure of the relict plant Amborella trichopoda
Source: PubMed Central journal article supplement (PMC5562301; doi:10.1371/journal.pone.0183412), 2017-08-18
Supplement: pone.0183412.s010.pdf [file pone.0183412.s010.pdf]

**S8 Table. Mean posterior estimates for key parameters of the spatially explicit demographic model.**

| <b>Forward expansion parameters</b>             | <b>Mean posterior estimate</b> | <b>95% credible interval</b> |
|-------------------------------------------------|--------------------------------|------------------------------|
| Carrying capacity of the Northern zone, $K_N^a$ | 558                            | 62–1,334                     |
| Carrying capacity of the Central zone, $K_C^a$  | 826                            | 134–1,417                    |
| Carrying capacity of the Southern zone, $K_S^a$ | 24                             | 4–177                        |
| Intrinsic growth rate, $r$                      | 0.468                          | 0.452–9.60                   |
| Intrinsic stepwise migration rate, $m$          | 0.0262                         | 0.0039–0.2150                |
| Elevational threshold (meters) <sup>b</sup>     | 607                            | 36–1,360                     |

<sup>a</sup> Carrying capacities are given as the number of diploid individuals per hectare.

<sup>b</sup> The elevational threshold is a parameter separating two different trends of the gene flow relative to the topography.
